# Supplementary material
Source: Elsevier journal article supplement (https://www.sciencedirect.com/science/article/pii/S2529984019300370)
Supplement: mmc1 [file S2529984019300370:mmc1.doc]

Anexo 127. **CUESTIONARIO SOBRE EL DOLOR POSTOPERATORIO**

Las siguientes preguntas hacen referencia al dolor que usted ha experimentado durante las primeras 24 horas después de la operación

**P1**. En esta escala, indique el **menor** dolor sufrido en estas primeras 24 horas:

|  | 0 | 1 | | 2 | 3 | | 4 | | 5 | | 6 | | 7 | | 8 | | 9 | | 10 |  |
| --- | --- | --- | --- | --- | --- | --- | --- | --- | --- | --- | --- | --- | --- | --- | --- | --- | --- | --- | --- | --- |
| Sin dolor | | |  | | |  | |  | |  | |  | |  | |  | | El peor dolor posible | | | |

**P2**. En esta escala, indique el **peor** dolor sufrido en estas primeras 24 horas:

|  | 0 | 1 | 2 | | 3 | | 4 | | 5 | | 6 | | 7 | | 8 | | 9 | 10 |  |
| --- | --- | --- | --- | --- | --- | --- | --- | --- | --- | --- | --- | --- | --- | --- | --- | --- | --- | --- | --- |
| Sin dolor | | | |  | |  | |  | |  | |  | |  | | El peor dolor posible | | | | |

**P3.** ¿Con qué frecuencia ha experimentado dolor **intenso** en las primeras 24 horas?

Rodee con un círculo el porcentaje de tiempo que mejor exprese el dolor intenso experimentado:

|  | 0% | 10% | 20% | 30% | | 40% | | 50% | | 60% | | 70% | | 80% | | 90% | 100% |  |
| --- | --- | --- | --- | --- | --- | --- | --- | --- | --- | --- | --- | --- | --- | --- | --- | --- | --- | --- |
| Nunca dolor intenso | | | | |  | |  | |  | |  | |  | | Siempre dolor intenso | | | |

**P4.** Rodee con un círculo el número que describe mejor cuánto **interfirió o le impidió** el dolor lo siguiente:

**a.** Hacer **actividades en la cama**, como girar, sentarse o cambiar de posición

|  | 0 | 1 | 2 | | 3 | 4 | 5 | 6 | 7 | 8 | 9 | 10 |  |
| --- | --- | --- | --- | --- | --- | --- | --- | --- | --- | --- | --- | --- | --- |
| No interfiere | | | | Interfiere completamente | | | | | | | | | |

**b.** **Respirar profundo o toser**

|  | 0 | 1 | 2 | | 3 | 4 | 5 | 6 | 7 | 8 | 9 | 10 |  |
| --- | --- | --- | --- | --- | --- | --- | --- | --- | --- | --- | --- | --- | --- |
| No interfiere | | | | Interfiere completamente | | | | | | | | | |

**c.** **Dormir**

|  | 0 | 1 | 2 | | 3 | 4 | 5 | 6 | 7 | 8 | 9 | 10 |  |
| --- | --- | --- | --- | --- | --- | --- | --- | --- | --- | --- | --- | --- | --- |
| No interfiere | | | | Interfiere completamente | | | | | | | | | |

**d.** Se ha **levantado** de la cama desde la cirugía? __No __Si

En caso afirmativo, cuánto **interfirió o le impidió** el dolor hacer **actividades fuera de la cama,** como andar, sentarse en una silla o estar de pie en el lavabo

|  | 0 | 1 | 2 | | 3 | 4 | 5 | 6 | 7 | 8 | 9 | 10 |  |
| --- | --- | --- | --- | --- | --- | --- | --- | --- | --- | --- | --- | --- | --- |
| No interfiere | | | | Interfiere completamente | | | | | | | | | |

**P5.** El dolor puede afectar a su estado de ánimo y emociones.

Marque con un círculo el número que mejor muestre lo que el dolor le hace sentir:

| **a.** **Ansioso** | | | 0 | 1 | 2 | | 3 | 4 | 5 | 6 | 7 | 8 | 9 | 10 |  |
| --- | --- | --- | --- | --- | --- | --- | --- | --- | --- | --- | --- | --- | --- | --- | --- |
|  | En absoluto | | | | | Extremadamente | | | | | | | | | |
|  | | | | | | | | | | | | | | | |
| **b.** **Indefenso** | | | 0 | 1 | 2 | | 3 | 4 | 5 | 6 | 7 | 8 | 9 | 10 |  |
|  | | - - - - 1. En absoluto | | | | Extremadamente | | | | | | | | | |
|  | |  | | | |  | | | | | | | | | |

**P6.** ¿Ha tenido usted alguno de estos efectos secundarios?

Rodee con un círculo el “0” si no ha tenido ninguno; en caso afirmativo, indique el número que mejor exprese la intensidad de cada efecto

| **a.** Naúsea | 0 | 1 | 2 | 3 | 4 | 5 | 6 | 7 | 8 | 9 | 10 |
| --- | --- | --- | --- | --- | --- | --- | --- | --- | --- | --- | --- |

- - - 1. ninguna intensa

| **b.** Somnolencia | 0 | 1 | 2 | 3 | 4 | 5 | 6 | 7 | 8 | 9 | 10 |
| --- | --- | --- | --- | --- | --- | --- | --- | --- | --- | --- | --- |

- - - 1. ninguna intensa

| **c.** Picor | 0 | 1 | 2 | 3 | 4 | 5 | 6 | 7 | 8 | 9 | 10 |
| --- | --- | --- | --- | --- | --- | --- | --- | --- | --- | --- | --- |

- - - 1. ninguno intenso

| **d.** Mareos | 0 | 1 | 2 | 3 | 4 | 5 | 6 | 7 | 8 | 9 | 10 |
| --- | --- | --- | --- | --- | --- | --- | --- | --- | --- | --- | --- |

ninguno intenso

**P7.** En las primeras 24 horas, ¿cuánto **alivio** de dolor ha experimentado?

Rodee con un círculo el porcentaje que mejor exprese cuánto alivio ha experimentado con todos los tratamientos combinados (tratamientos con medicinas o sin ellas):

| 0% | 10% | 20% | 30% | | | 40% | | 50% | | 60% | | 70% | | 80% | | 90% | | 100% |  |
| --- | --- | --- | --- | --- | --- | --- | --- | --- | --- | --- | --- | --- | --- | --- | --- | --- | --- | --- | --- |
| Sin alivio | | | |  |  | |  | |  | |  | |  | |  | | Alivio completo | | |

**P8.** ¿Le han **permitido participar en la toma de decisiones** sobre el tratamiento de su dolor tanto como le hubiera gustado?

| 0 | 1 | 2 | 3 | 4 | 5 | 6 | 7 | 8 | 9 | 10 |
| --- | --- | --- | --- | --- | --- | --- | --- | --- | --- | --- |

Para nada Mucho

**P9.** Indique el número que mejor expresa su **satisfacción** con los resultados del tratamiento del dolor que ha recibido durante su estancia en nuestro hospital:

|  | 0 | 1 | 2 | 3 | 4 | 5 | 6 | 7 | 8 | 9 | 10 |  |
| --- | --- | --- | --- | --- | --- | --- | --- | --- | --- | --- | --- | --- |
| - - - - 1. Extremadamente insatisfecho Extremadamente satisfecho | | | | | | | | | | | | |

**P10.** ¿Ha recibido **información** sobre las opciones para el tratamiento de su dolor?

__No __Sí

a. En caso afirmativo, indique el número que mejor exprese **la utilidad** de la información:

|  | 0 | 1 | | 2 | 3 | 4 | 5 | 6 | 7 | 8 | | 9 | 10 |  |
| --- | --- | --- | --- | --- | --- | --- | --- | --- | --- | --- | --- | --- | --- | --- |
| - - - - 1. Nada útil | | |  | | | | | | | | Extremadamente  útil | | | |

**P11.** ¿Ha utilizado algún **método no farmacológico** para aliviar su dolor? __No__Sí.

En caso afirmativo, **indique todos** los utilizados:

- Compresas frías - Meditación
- Respirar Profundamente - Escuchar música
- Distracción (verla TV, leer) - Rezar
- Calor - Relajación
- Imágenes o visualización - Caminar
- Masajes - Otros (por favor describir) ___

**P12**. ¿Con qué frecuencia la enfermera o el doctor le **han animado a utilizar** métodos no farmacológicos?

_____ nunca _____ algunas veces _____ a menudo

**P13.** ¿Ha experimentado **dolor persistente en los últimos 3 meses** o más antes de venir al hospital? __No __Si

**a.** En caso afirmativo, ¿cuán **severo** ha sido el dolor la mayor parte del tiempo? Rodee con un círculo el número que mejor refleja esto

|  | 0 | 1 | | 2 | 3 | | 4 | | 5 | | 6 | | 7 | | 8 | | 9 | | | 10 |  |
| --- | --- | --- | --- | --- | --- | --- | --- | --- | --- | --- | --- | --- | --- | --- | --- | --- | --- | --- | --- | --- | --- |
| Sin dolor | | |  | | |  | |  | |  | |  | |  | |  | |  | El peor dolor posible | | |

**b.** En caso afirmativo, ¿**dónde** ha experimentado **dolor persistente**?

__lugar de la cirugía __otro sitio __ambos (lugar de la cirugía y otro sitio)

Muchas gracias por su colaboración
